# Supplementary material for: An Online Training Intervention on Prehospital Stroke Codes in Catalonia to Improve the Knowledge, Pre-Notification Compliance and Time Performance of Emergency Medical Services Professionals
Source: MDPI journal article supplement (doi:10.3390/ijerph17176183), 2020-08-26
Supplement: s1 [file s1]

| RACE SCALE                                                                  |   |
|-----------------------------------------------------------------------------|---|
| <b>1. Facial palsy:</b>                                                     |   |
| Facial movement is normal, symmetric                                        | 0 |
| Facial gesture when showing the teeth or smiling is slightly asymmetrical   | 1 |
| Facial gesture when showing the teeth or smiling is completely asymmetrical | 2 |
| <b>2. Arm motor function:</b>                                               |   |
| Maintain the arm against gravity >10 seconds                                | 0 |
| Maintain the arm against gravity <10 seconds                                | 1 |
| Cannot maintain the arm against gravity and drops immediately               | 2 |
| <b>3. Leg motor function:</b>                                               |   |
| Maintain the leg against gravity >5 seconds                                 | 0 |
| Maintain the leg against gravity <5seconds                                  | 1 |
| Cannot maintain the leg against gravity and drops immediately               | 2 |
| <b>4. Head and gaze deviation</b>                                           |   |
| Absent                                                                      | 0 |
| Present                                                                     | 1 |
| <b>5A. Agnosia / Negligence (if left hemiparesis)</b>                       |   |
| <i>Asomatognosia (do not recognize the left part of his/her body)</i>       |   |
| <i>Anosognosia (do not recognize his/her weakness)</i>                      |   |
| There is no asomatognosia nor anosognosia                                   | 0 |
| There is asomatognosia or anosognosia                                       | 1 |
| There is asomatognosia and anosognosia                                      | 2 |
| <b>5B. Aphasia / Language (if right hemiparesis)</b>                        |   |
| <i>Ask the patient: "Close your eyes" and "Make a fist"</i>                 |   |
| Perform both tasks correctly                                                | 0 |
| Perform one task correctly                                                  | 1 |
| Perform neither tasks                                                       | 2 |
| <b>TOTAL</b>                                                                |   |
